# Supplementary material for: Inequity in access to continuous glucose monitoring and health outcomes in paediatric diabetes, a case for national continuous glucose monitoring funding: A cross-sectional population study of children with type 1 diabetes in New Zealand
Source: PubMed Central journal article supplement — Lancet Reg Health West Pac. 2022 Nov 17;31:100644. doi: 10.1016/j.lanwpc.2022.100644 (PMC9676142; doi:10.1016/j.lanwpc.2022.100644), 2022-11-17
Supplement: mmc1.pdf [file mmc1.pdf]

## **Supplemental Appendix**

**Inequity in access to continuous glucose monitoring and health outcomes in paediatric diabetes, a case for national continuous glucose monitoring funding: A cross-sectional population study of children with type 1 diabetes in New Zealand.**

**List of Authors**

Mercedes J. Burnside, MBChB.

Jonathan A. Williman, Ph.D.

Hannah M. Davies.

Craig A. Jefferies, M.D.

Ryan G. Paul, Ph.D.

Benjamin J. Wheeler, Ph.D.

Esko J. Wiltshire, MD.

Yvonne C. Anderson, Ph.D.

Martin I. de Bock, Ph.D.

|                                                                                                                   |    |
|-------------------------------------------------------------------------------------------------------------------|----|
| <b>Table of Contents</b>                                                                                          |    |
| List of Authors .....                                                                                             | 2  |
| <b>Table of Contents</b> .....                                                                                    | 3  |
| <b>Supplemental Tables</b> .....                                                                                  | 4  |
| Supplemental Table 1: Participant data recorded. ....                                                             | 4  |
| Supplemental Table 2: Description of study sample. ....                                                           | 5  |
| Supplemental Table 3: Associations between demographic and clinical factors with level of glycaemic control. .... | 7  |
| <b>Supplemental Figures</b> .....                                                                                 | 9  |
| Supplemental Figure 1: District Health Board territories in New Zealand. ....                                     | 9  |
| Supplemental Figure 2: CGM use by District Health Board. ....                                                     | 10 |
| <b>References</b> .....                                                                                           | 11 |

## Supplemental Tables

**Supplemental Table 1: Participant data recorded.**

| <b>Participant demographic characteristics</b>                                                                                                                                                                                                                                                                                                                                                                                                                                                                                                                                                                                                                                                                                                                                                                                                                                                                                                                                                                                                                                                                               |
|------------------------------------------------------------------------------------------------------------------------------------------------------------------------------------------------------------------------------------------------------------------------------------------------------------------------------------------------------------------------------------------------------------------------------------------------------------------------------------------------------------------------------------------------------------------------------------------------------------------------------------------------------------------------------------------------------------------------------------------------------------------------------------------------------------------------------------------------------------------------------------------------------------------------------------------------------------------------------------------------------------------------------------------------------------------------------------------------------------------------------|
| Age in years<br>Gender<br>Ethnicity <sup>a</sup><br>Meshblock <sup>b</sup>                                                                                                                                                                                                                                                                                                                                                                                                                                                                                                                                                                                                                                                                                                                                                                                                                                                                                                                                                                                                                                                   |
| <b>General diabetes information</b>                                                                                                                                                                                                                                                                                                                                                                                                                                                                                                                                                                                                                                                                                                                                                                                                                                                                                                                                                                                                                                                                                          |
| Date of Type 1 Diabetes diagnosis <sup>c</sup><br>District Health Board (DHB)<br>Glycated haemoglobin (HbA1c) <sup>d</sup><br>Insulin therapy (multiple daily injections, insulin pump therapy, automated insulin delivery) <sup>e</sup>                                                                                                                                                                                                                                                                                                                                                                                                                                                                                                                                                                                                                                                                                                                                                                                                                                                                                     |
| <b>CGM information</b>                                                                                                                                                                                                                                                                                                                                                                                                                                                                                                                                                                                                                                                                                                                                                                                                                                                                                                                                                                                                                                                                                                       |
| CGM use (yes/no) <sup>f</sup><br>Type of CGM (intermittently scanned, or real time)<br>How CGM is funded (self, Work and Income New Zealand (WINZ), DHB, research, other)                                                                                                                                                                                                                                                                                                                                                                                                                                                                                                                                                                                                                                                                                                                                                                                                                                                                                                                                                    |
| <p><sup>a</sup>The spreadsheet allowed for the recording of up to six self-reported ethnicities per participant; however, participants were allocated to a single ethnic group for statistical output prioritised in the order of Māori, Pacific, Asian and European/Other, as per standard protocol (1).</p> <p><sup>b</sup>A meshblock (a small area code) was provided rather than participant address because it is de-identified. Meshblocks were used to generate New Zealand Index of Deprivation Scores (2018).</p> <p><sup>c</sup>Date of type 1 diabetes diagnosis was used to calculate age at diagnosis and duration of diabetes.</p> <p><sup>d</sup>Last recorded HbA1c in the six months between the 01 April 2021 - 01 October 2021. Glucose management indicator (GMI) was not used if a point of care/local laboratory HbA1c test was not available.</p> <p><sup>e</sup>Insulin pump therapy did not distinguish between standard pump therapy and sensor augmented pump therapy.</p> <p><sup>f</sup>CGM use was a binary (yes/no) outcome. No percent time in use definition was applied to “CGM use”.</p> |

**Supplemental Table 2: Description of study sample.**

|                                                                                                                                   |                                  |
|-----------------------------------------------------------------------------------------------------------------------------------|----------------------------------|
| <b>Demographics</b>                                                                                                               |                                  |
| Age – no. (%)                                                                                                                     | <b>N= 1209</b>                   |
| < 5 yr                                                                                                                            | 72 (6.0%)                        |
| 5 to < 10 yr                                                                                                                      | 372 (30.8%)                      |
| 10 to < 15 yr                                                                                                                     | 765 (63.2%)                      |
| Median (IQR)                                                                                                                      | 11 (8, 13)                       |
| Gender – no. (%)                                                                                                                  | <b>N= 1209</b>                   |
| Female                                                                                                                            | 607 (50.2%)                      |
| Ethnicity – no. (%) <sup>a</sup>                                                                                                  | <b>N= 1208</b>                   |
| Māori                                                                                                                             | 219 (18.1%)                      |
| Pacific                                                                                                                           | 86 (7.1%)                        |
| Asian                                                                                                                             | 55 (4.6%)                        |
| Middle Eastern/Latin American/African (MELAA)                                                                                     | 22 (1.8%)                        |
| Other                                                                                                                             | 21 (1.7%)                        |
| European                                                                                                                          | 805 (66.6%)                      |
| New Zealand Deprivation Index (quintile) – no. (%) <sup>b</sup>                                                                   | <b>N= 1207</b>                   |
| 1 (least deprived)                                                                                                                | 279 (23.1%)                      |
| 2                                                                                                                                 | 258 (21.4%)                      |
| 3                                                                                                                                 | 230 (19.1%)                      |
| 4                                                                                                                                 | 226 (18.7%)                      |
| 5 (most deprived)                                                                                                                 | 214 (17.7%)                      |
| <b>Diabetes information</b>                                                                                                       |                                  |
| Age at diagnosis, median (IQR)                                                                                                    | <b>N= 1208</b><br>5.9 (3.1, 8.8) |
| Duration of diabetes, median (IQR)                                                                                                | <b>N= 1208</b><br>3.6 (1.5, 6.2) |
| District Health Board – no. (%)                                                                                                   | <b>N= 1209</b>                   |
| Northland                                                                                                                         | 43 (3.6%)                        |
| Waitemata                                                                                                                         | 102 (8.4%)                       |
| Auckland                                                                                                                          | 74 (6.1%)                        |
| Counties Manukau                                                                                                                  | 115 (9.5%)                       |
| Waikato                                                                                                                           | 108 (8.9%)                       |
| Bay of Plenty                                                                                                                     | 59 (4.9%)                        |
| Taranaki                                                                                                                          | 43 (3.6%)                        |
| Lakes                                                                                                                             | 31 (2.6%)                        |
| Tairāwhiti                                                                                                                        | 12 (1.0%)                        |
| Whanganui                                                                                                                         | 23 (1.9%)                        |
| Mid Central                                                                                                                       | 55 (4.5%)                        |
| Hawkes Bay                                                                                                                        | 53 (4.4%)                        |
| Capital and Coast                                                                                                                 | 70 (5.8%)                        |
| Hutt Valley                                                                                                                       | 65 (5.4%)                        |
| Wairarapa                                                                                                                         | 8 (0.7%)                         |
| Nelson/ Marlborough                                                                                                               | 39 (3.2%)                        |
| West Coast                                                                                                                        | 13 (1.1%)                        |
| Canterbury                                                                                                                        | 150 (12.4%)                      |
| South Canterbury                                                                                                                  | 35 (2.9%)                        |
| Southern                                                                                                                          | 111 (9.2%)                       |
| HbA1c, mmol/mol <sup>c</sup>                                                                                                      | <b>N= 1187</b>                   |
| 32 to < 53                                                                                                                        | 175 (14.7%)                      |
| ≥ 53                                                                                                                              | 1012 (85.3%)                     |
| Median (IQR)                                                                                                                      | 64 (56, 75)                      |
| Insulin modality – no. (%)                                                                                                        | <b>N= 1209</b>                   |
| Injections                                                                                                                        | 697 (57.7%)                      |
| Insulin pump <sup>d</sup>                                                                                                         | 484 (40.0%)                      |
| Automated insulin delivery                                                                                                        | 28 (2.3%)                        |
| <b>CGM information</b>                                                                                                            |                                  |
| Glucose monitoring modality – no. (%) <sup>e</sup>                                                                                | <b>N= 1203</b>                   |
| Self-monitoring of blood glucose                                                                                                  | 392 (32.6%)                      |
| Intermittently scanned CGM                                                                                                        | 484 (40.2%)                      |
| Real time CGM                                                                                                                     | 327 (27.2%)                      |
| How CGM funded – no. (%)                                                                                                          | <b>N= 778</b>                    |
| Self                                                                                                                              | 679 (87.3%)                      |
| Research                                                                                                                          | 51 (6.6%)                        |
| Work and Income New Zealand (WINZ)                                                                                                | 27 (3.5%)                        |
| Other                                                                                                                             | 18 (2.3%)                        |
| DHB                                                                                                                               | 3 (0.4%)                         |
| *Data are presented as n (%) unless otherwise indicated.                                                                          |                                  |
| ** Waitemata, Auckland and Counties Manukau are three district health boards (DHBs) under a single regional diabetes service, and |                                  |

Canterbury and West Coast DHBs share a single regional diabetes service.

<sup>a</sup>Participants could select up to six ethnicities; however, they were allocated to a single ethnic group for statistical output prioritised in the order of Māori, Pacific, Asian, MELAA, other, European.

<sup>b</sup>The New Zealand deprivation index is an area-based measure of socioeconomic deprivation where quintile 5 represents the 20% most deprived areas in New Zealand.

<sup>c</sup>Local laboratory/point of care HbA1c, last recorded between 01 April 2021 and 01 October 2021.

<sup>d</sup>Insulin pump includes standard pump therapy and sensor augmented pump therapy.

<sup>e</sup>CGM use (real-time and intermittent) – a patient was regarded as “using” CGM irrespective of how often it was used.

**Supplemental Table 3: Associations between demographic and clinical factors with level of glycaemic control.**

| Demographic Information                  | HbA1c, mmol/mol |                                   |                                     |                                       |
|------------------------------------------|-----------------|-----------------------------------|-------------------------------------|---------------------------------------|
|                                          | Mean (SD)       | Unadjusted difference<br>(95% CI) | CGM adjusted difference<br>(95% CI) | Fully adjusted difference<br>(95% CI) |
| Age                                      |                 | <i>P</i> < 0.001                  | <i>P</i> = 0.004                    | <i>P</i> < 0.001                      |
| < 5 yr                                   | 63.2 (15.9)     | 0                                 | 0                                   | 0                                     |
| 5 to < 10 yr                             | 64.1 (14.3)     | 0.9 (-4.0, 5.8)                   | -0.1 (-4.8, 4.5)                    | -1.7 (-6.1, 2.8)                      |
| 10 to < 15 yr                            | 68.2 (16.5)     | 5.0 (0.3, 9.7)                    | 3.1 (-1.3, 7.5)                     | 2.3 (-2.1, 6.7)                       |
| Gender                                   |                 | <i>p</i> = 0.209                  | <i>p</i> = 0.188                    | <i>p</i> = 0.074                      |
| Female                                   | 67.3 (16.4)     | 0                                 | 0                                   | 0                                     |
| Male                                     | 66.1 (15.6)     | -1.2 (-3.1, 0.7)                  | -1.2 (-3.0, 0.6)                    | -1.5 (-3.2, 0.1)                      |
| New Zealand Deprivation Index (quintile) |                 | <i>P</i> < 0.001                  | <i>P</i> < 0.001                    | <i>P</i> = 0.012                      |
| 1 (least deprived)                       | 62.0 (12.5)     | 0                                 | 0                                   | 0                                     |
| 2                                        | 64.5 (14.4)     | 2.5 (-0.9, 5.9)                   | 1.6 (-1.7, 4.9)                     | 1.4 (-1.7, 4.5)                       |
| 3                                        | 64.4 (14.0)     | 2.4 (-1.1, 6.0)                   | 1.3 (-2.1, 4.8)                     | 0.6 (-2.6, 3.9)                       |
| 4                                        | 69.3 (18.1)     | 7.3 (3.8, 10.9)                   | 4.7 (1.2, 8.2)                      | 2.8 (-0.7, 6.2)                       |
| 5 (most deprived)                        | 75.0 (17.9)     | 13.0 (9.4, 16.7)                  | 9.1 (5.4, 12.7)                     | 5.2 (1.5, 9.0)                        |
| <b>Diabetes Information</b>              |                 |                                   |                                     |                                       |
| Duration of diabetes                     |                 | <i>P</i> = 0.002                  | <i>P</i> = 0.002                    | <i>P</i> < 0.001                      |
| < 2 yr                                   | 63.6 (15.6)     | 0                                 | 0                                   | 0                                     |
| 2 to < 4 yr                              | 67.6 (16.3)     | 3.9 (0.9, 7.0)                    | 3.6 (0.7, 6.4)                      | 4.0 (1.2, 6.7)                        |
| 4 to < 15 yr                             | 67.7 (15.9)     | 4.0 (1.4, 6.7)                    | 3.9 (1.4, 6.4)                      | 4.8 (2.2, 7.3)                        |
| Insulin modality                         |                 | <i>p</i> < 0.001                  | <i>p</i> < 0.001                    | <i>p</i> < 0.001                      |
| Insulin injections                       | 70.5 (17.8)     | 0                                 | 0                                   | 0                                     |
| Insulin pump                             | 62.4 (12.0)     | -8.1 (-10.2, -6.0)                | -4.3 (-6.6, -2.0)                   | -4.9 (-7.3, -2.6)                     |
| Automated insulin delivery               | 57.0 (9.4)      | -13.5 (-20.4, -6.6)               | -7.2 (-14.1, -0.3)                  | -8.2 (-14.9, -1.4)                    |
| District Health Board                    |                 | <i>P</i> < 0.001                  | <i>P</i> < 0.001                    | <i>P</i> = 0.002                      |

|                     |             |                    |                    |                    |
|---------------------|-------------|--------------------|--------------------|--------------------|
| Northland           | 73.4 (17.3) | 5.9 (-2.7, 14.4)   | 3.5 (-4.6, 11.7)   | 1.4 (-6.4, 9.1)    |
| Waitemata           | 66.2 (17.9) | -1.6 (-6.9, 3.6)   | -2.4 (-7.4, 2.6)   | -1.3 (-6.1, 3.5)   |
| Auckland            | 63.9 (16.4) | -4.1 (-10.1, 1.9)  | -5.1 (-10.8, 0.6)  | -4.2 (-9.7, 1.2)   |
| Counties Manukau    | 73.1 (18.5) | 5.6 (0.6, 10.6)    | 2.6 (-2.3, 7.5)    | 1.2 (-3.7, 6.1)    |
| Waikato             | 65.3 (17.0) | -2.6 (-7.8, 2.6)   | -2.6 (-7.5, 2.3)   | -3.3 (-8.0, 1.4)   |
| Bay of Plenty       | 68.3 (16.8) | 0.6 (-6.4, 7.5)    | 2.0 (-4.6, 8.6)    | 1.8 (-4.5, 8.0)    |
| Taranaki            | 69.6 (13.5) | 1.9 (-6.0, 9.8)    | 1.6 (-5.9, 9.0)    | 1.3 (-5.8, 8.4)    |
| Lakes               | 73.9 (22.6) | 6.5 (-2.6, 15.6)   | 6.5 (-2.1, 15.2)   | 3.6 (-4.6, 11.8)   |
| Tairāwhiti          | 74.9 (9.8)  | 7.5 (-7.5, 22.5)   | 6.9 (-7.3, 21.2)   | 2.5 (-11.1, 16.0)  |
| Whanganui           | 74.4 (16.2) | 7.0 (-3.5, 17.4)   | 5.2 (-4.7, 15.1)   | 3.7 (-6.0, 13.5)   |
| Mid Central         | 66.2 (17.7) | -1.7 (-8.6, 5.3)   | -2.5 (-9.1, 4.1)   | -2.0 (-8.3, 4.2)   |
| Hawkes Bay          | 76.1 (16.4) | 8.7 (1.5, 15.9)    | 7.4 (0.5, 14.2)    | 5.6 (-0.9, 12.1)   |
| Capital and Coast   | 64.3 (12.6) | -3.7 (-9.8, 2.5)   | -3.2 (-9.0, 2.6)   | -2.0 (-7.5, 3.5)   |
| Hutt Valley         | 64.6 (11.8) | -3.4 (-9.9, 3.1)   | -2.8 (-9.0, 3.4)   | -2.4 (-8.2, 3.5)   |
| Wairarapa           | 61.6 (12.1) | -6.6 (-24.4, 11.3) | -2.5 (-19.5, 14.4) | -1.5 (-17.7, 14.8) |
| Nelson/ Marlborough | 65.5 (12.8) | -2.4 (-10.3, 5.5)  | -1.7 (-9.2, 5.8)   | 0.0 (-7.1, 7.1)    |
| West Coast          | 65.2 (14.9) | -2.8 (-16.0, 10.4) | -0.9 (-13.5, 11.6) | 1.3 (-11.1, 13.7)  |
| Canterbury          | 60.8 (12.4) | -7.4 (-11.8, -2.9) | -7.1 (-11.3, -2.9) | -6.0 (-10.0, -1.9) |
| South Canterbury    | 64.9 (11.1) | -3.1 (-11.6, 5.5)  | -2.3 (-10.4, 5.8)  | 0.9 (-7.0, 8.8)    |
| Southern            | 63.7 (13.2) | -4.3 (-9.3, 0.8)   | -2.5 (-7.4, 2.3)   | -0.5 (-5.2, 4.1)   |

\* An interaction effect was found between ethnicity and continuous glucose monitoring (CGM); therefore, results for ethnicity and CGM use are presented separately in Table 2.

\*\* CGM adjusted differences are adjusted for CGM use (self-monitoring of blood glucose, intermittently scanned CGM, or real time CGM). Fully adjusted differences are adjusted for age, gender, ethnicity, deprivation, duration of diabetes, district health board, insulin modality, and CGM use.

\*\*\* The reference category for district health board is all 'other district health boards.'

\*\*\*\* Waitemata, Auckland and Counties Manukau are three district health boards under a single regional diabetes service, and Canterbury and West Coast are two district health boards under a single regional diabetes service.

\*\*\*\*\* Insulin pump therapy includes both standard pump therapy and sensor augmented pump therapy.



**Supplemental Figures**

**Supplemental Figure 1: District Health Board territories in New Zealand.**

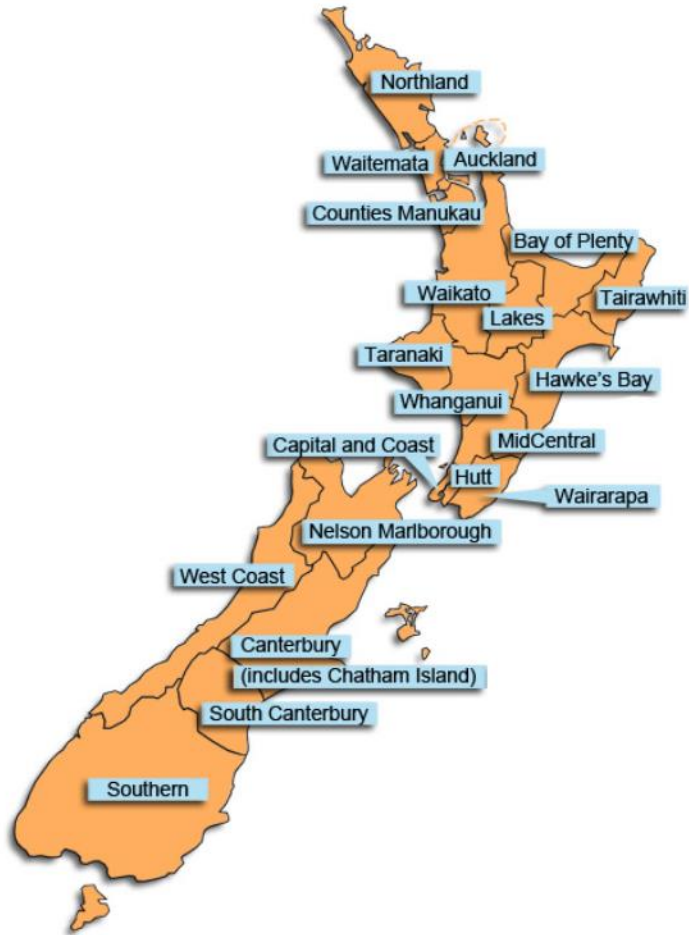

**Supplemental Figure 1: Map showing the 20 District Health Boards in New Zealand and their boundaries.**

**Supplemental Figure 2: CGM use by District Health Board.**

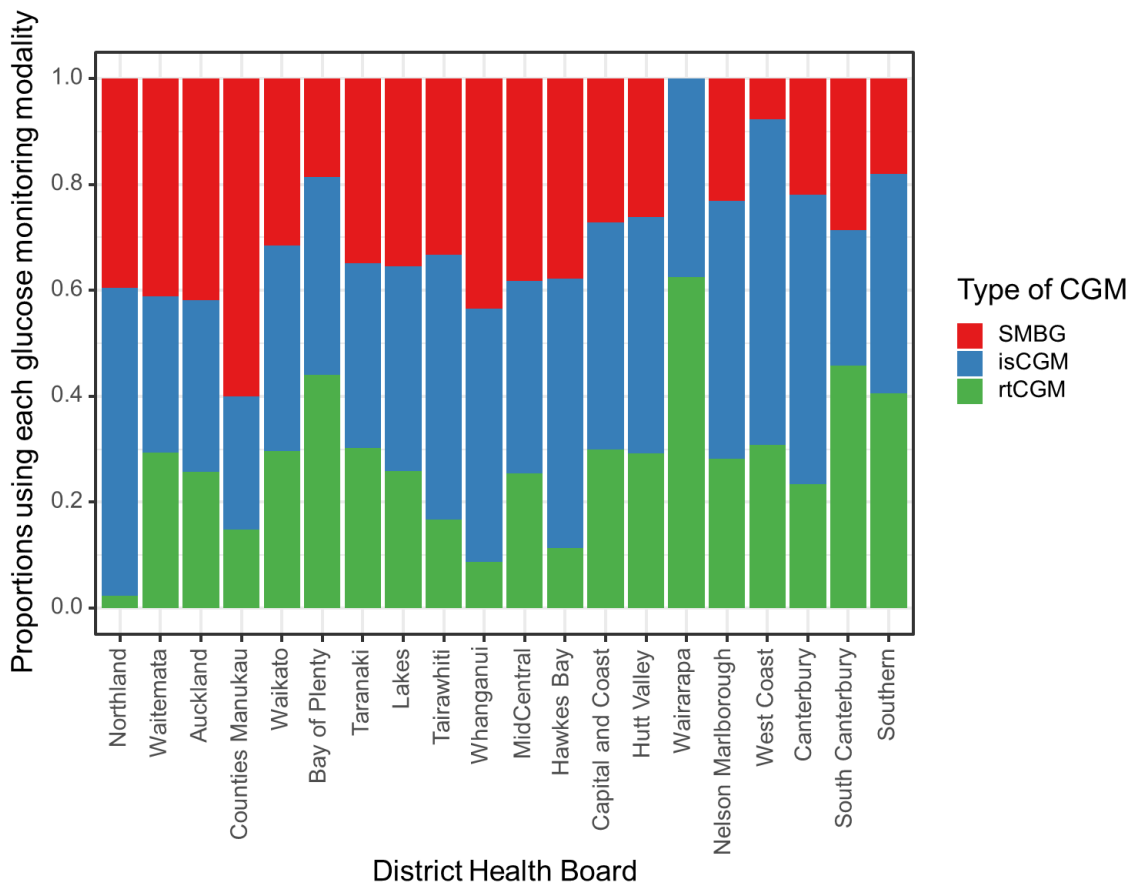

**Supplemental Figure 2: CGM use by District Health Board.**

Coloured filled bars represent unadjusted proportions of children <15 years with type 1 diabetes using intermittently scanned continuous glucose monitoring (isCGM), real time continuous glucose monitoring (rtCGM), or self-monitoring of blood glucose (SMBG) at each district health board (DHB) in New Zealand. DHBs are listed by location in order of North to South. Waitemata, Auckland, and Counties Manukau DHBs represent a single regional diabetes service, and Canterbury and West Coast represent a single regional diabetes service.

**References**

1. Ministry of Health. 2017. HISO 10001:2017 Ethnicity Data Protocols. Wellington: Ministry of Health.
