# Supplementary material for: Inequity in access to continuous glucose monitoring and health outcomes in paediatric diabetes, a case for national continuous glucose monitoring funding: A cross-sectional population study of children with type 1 diabetes in New Zealand
Source: PubMed Central journal article supplement — Lancet Reg Health West Pac. 2022 Nov 17;31:100644. doi: 10.1016/j.lanwpc.2022.100644 (PMC9676142; doi:10.1016/j.lanwpc.2022.100644), 2022-11-17
Supplement: mmc2.pdf [file mmc2.pdf]

Proportions using each glucose monitoring modality

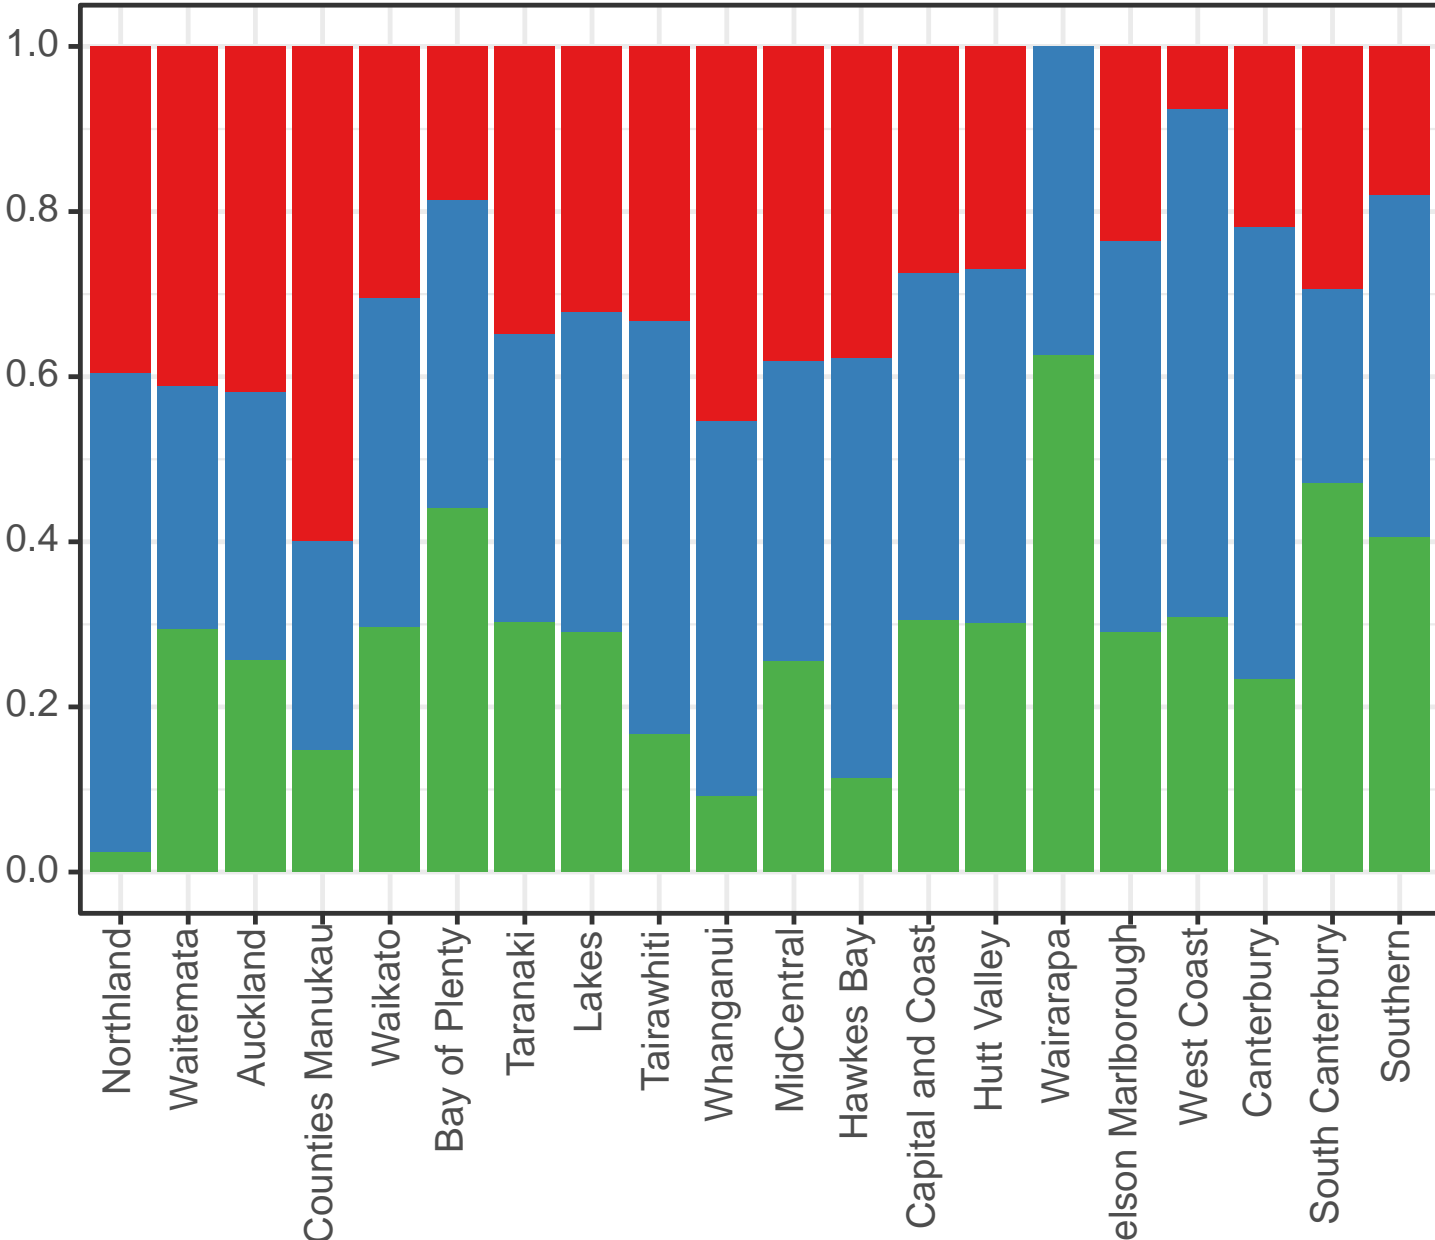

Type of CGM

- SMBG
- isCGM
- rtCGM

District Health Board
